# Supplementary material
Source: Springer Nature journal article supplement (https://www.springermedizin.de/resource/supplementary/12879_2008_787_MOESM5_ESM.pdf/9449782)

**a**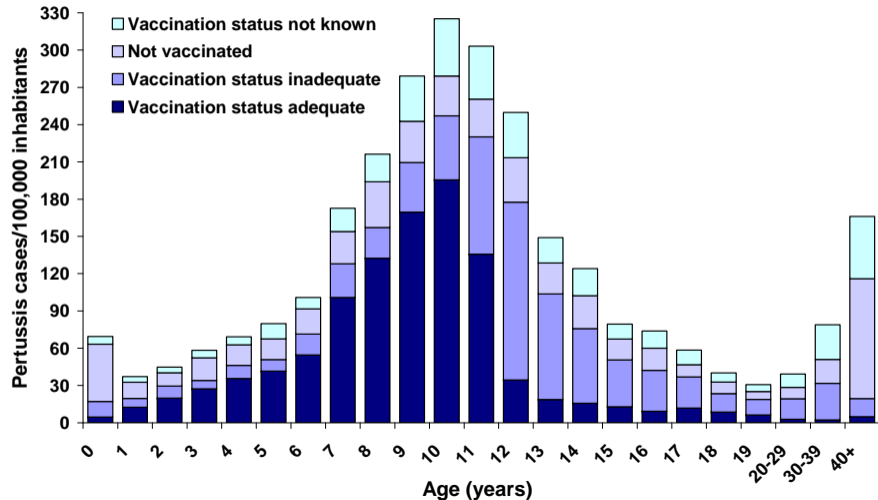**b**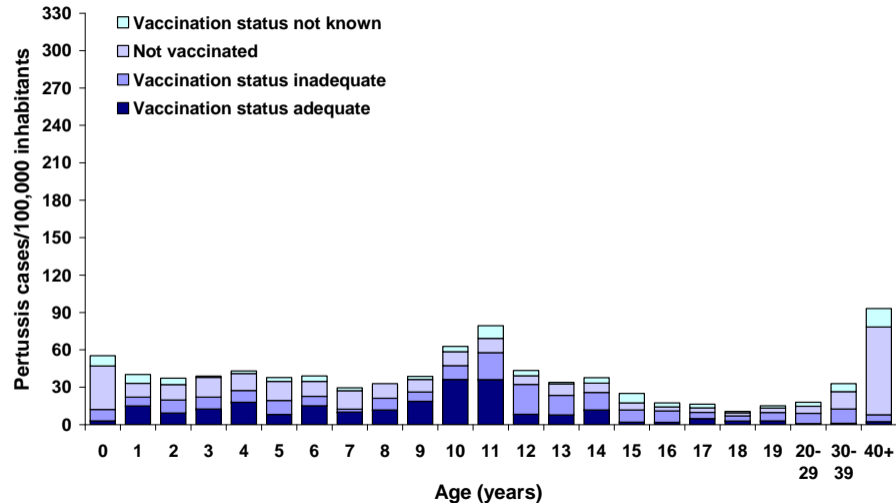

Supplement: MOESM5 [file 9449782]
